# Supplementary material for: Identification of crucial anoikis-related genes as novel biomarkers and potential therapeutic targets for lung adenocarcinoma via bioinformatic analysis and experimental verification
Source: Aging (Albany NY). 2024 Feb 9;16(3):2887–907. doi: 10.18632/aging.205521 (PMC10911345; doi:10.18632/aging.205521)
Supplement: Supplementary Table 1 [file aging-16-205521-s002.xls]

## Sheet: supplementary table 1
Supplementary Table 1. Differentially expressed genes of LUAD from the TCGA-LUAD dataset, compared to normal samples (P<0.05, and adj.p.val>1).
	logFC	adj.P.Val
ABHD2	-0.762875	1.74e-08
ABHD4	0.236411	0.0192
ABL1	-0.0476614	0.637
ADCY10	0.0248242	0.0921
AES	-0.598405	1.45e-14
AFAP1L1	-1.42293	1.85e-54
AFP	0.0945591	0.258
AKT1	-0.178874	0.0109
AKT2	0.145976	0.0214
AKT3	-0.950904	1.43e-24
ANGPTL2	0.027302	0.904
ANGPTL4	1.13766	2.54e-06
ANKRD13C	0.0893824	0.192
ANXA5	-0.560686	7.86e-13
APOBEC3G	0.0365909	0.818
AR	-0.457889	9.84e-08
ARHGEF7	-0.151831	0.00497
ATF4	-0.139584	0.0945
BAD	-0.129174	0.192
BAG1	-0.296379	0.00572
BAK1	0.678909	6.45e-18
BAX	0.18985	0.0112
BCAR1	-0.000119862	0.999
BCL2	-0.199642	0.0713
BCL2L1	-0.180653	0.0781
BCL2L11	0.37477	7.01e-09
BCL2L15	1.40346	6.3e-22
BDNF	-0.975427	7.45e-50
BID	0.184025	0.0696
BIRC3	-0.0617557	0.8
BIRC5	2.25937	2.92e-38
BMF	0.739684	1.4e-12
BMP6	-1.12892	4.49e-09
BNIP3	0.822892	2.86e-12
BNIP3L	-0.461305	5.08e-08
BRAF	-0.0327404	0.68
BRCA2	0.291343	3.98e-08
BRMS1	0.383044	4.27e-10
BSG	0.118155	0.233
BST2	-0.113478	0.612
CALR	0.565748	7.08e-14
CASP10	-0.147938	0.09
CASP2	0.445954	1.11e-12
CASP3	0.599889	8.73e-21
CASP6	0.784764	1.67e-25
CASP8	0.313042	3.28e-07
CASP9	-0.00857293	0.921
CAV1	-4.13858	6.07e-85
CBL	-0.344933	3.26e-07
CCAR2	-0.046656	0.592
CCDC178	-0.203471	1.84e-21
CYR61	-1.83406	5.3e-25
CTGF	-1.88648	1.87e-27
WISP3	0.154951	0.0346
CCND1	-0.386051	0.0241
CCR7	0.0972138	0.581
CD151	-0.34863	0.000542
CD36	-2.88675	4.39e-78
CD44	-1.28248	3.41e-21
CD63	-0.0584467	0.578
CDCP1	0.592884	5.92e-05
CDH1	0.818323	4.06e-11
CDH2	0.360628	0.0184
CDH3	1.93879	3.87e-19
CDK11A	0.248579	3.65e-05
CDK11B	0.0779149	0.276
CDKN1A	-0.828838	4.89e-12
CDKN1B	-0.230499	0.00238
CDKN2A	1.3238	1.87e-10
CDKN3	1.5178	1.01e-25
CEACAM1	1.41547	2.98e-22
CEACAM3	-0.249018	8.7e-12
CEACAM5	3.2237	1.6e-14
CEACAM6	0.545092	0.118
CEBPB	-0.343458	0.00139
KIAA1199	1.04957	3.61e-08
CFLAR	-0.741158	1.48e-19
CHEK2	0.854973	1.35e-21
CHUK	0.0459224	0.559
CLDN1	0.591755	0.00678
CLU	-1.11006	1.07e-06
CMA1	-0.493601	6.68e-20
COL13A1	-0.820829	2.35e-24
COL4A2	-0.554422	0.000212
COPS5	0.343334	1.13e-06
CPEB2	-0.445403	1.54e-09
CPT1A	-0.682154	5.24e-14
CRYAB	-1.8975	3.43e-49
CRYBA1	-0.0804509	6.02e-09
CSNK2A1	0.264085	3.96e-05
CSPG4	-0.638162	8.29e-10
CTNNB1	0.0377534	0.784
CTNND1	-0.189413	0.0315
CTTN	0.682682	1.11e-15
CXCL12	-1.40021	1.83e-24
IL8	0.165473	0.606
CXCR4	-0.127202	0.485
CYCS	0.437076	1.66e-06
DAP3	0.759104	1.11e-33
DAPK1	-1.27417	2.95e-24
DAPK2	-1.49402	1.37e-59
DLG1	-0.142522	0.0217
DOCK1	-0.0057926	0.96
E2F1	0.995018	9.51e-14
EDA2R	-0.158116	0.163
EDIL3	-0.968223	5.44e-09
EEF1A1	-0.307073	0.000565
EEF2K	-0.182784	0.0104
EGF	0.7167	1.65e-09
EGFR	-0.160724	0.471
EIF2AK3	0.168	0.0134
ELANE	-0.190381	0.0636
ELK1	0.29518	2.43e-07
EPHA2	-0.415526	0.0234
EPHB6	-0.845181	2.68e-15
ERBB2	0.640914	4.54e-07
ERBB4	-0.716833	7.76e-40
ETV4	2.56116	1.53e-51
EZH2	1.46965	1.01e-39
FADD	0.561554	1.4e-18
FAS	-0.652564	1.36e-07
FASLG	0.0282363	0.83
FASN	-0.748993	6.69e-06
FER	-0.467234	5.31e-19
FGF2	-1.16923	4.85e-56
FN1	-0.54451	0.00792
GLI2	0.056374	0.497
GLO1	0.0223753	0.861
GLUD1	-0.350982	1.51e-08
GRHL2	0.665273	1.64e-13
HAVCR2	-0.793954	2.2e-10
HGF	-0.714938	1.8e-14
HIF1A	0.462701	2.76e-05
HK2	-0.561219	0.00021
HMCN1	-0.694414	4.18e-11
HMGA1	1.88184	1.92e-32
HMOX1	-0.849452	4.24e-10
HOXA10	0.600975	8.45e-07
HRAS	0.0917423	0.365
HTRA1	-0.086115	0.643
IFI27	-0.470473	0.046
IGF1	-0.0786388	0.17
IGF1R	-0.141834	0.318
IKZF3	0.417965	7.56e-05
IL17A	0.0397873	0.0514
IL6	-1.93493	1.87e-25
ILK	-0.522264	2.8e-15
INHBB	0.562725	0.00369
IQGAP1	-0.387392	2.88e-06
ITGA2	0.908561	1.83e-06
ITGA3	-0.124472	0.57
ITGA4	-0.386643	5.73e-05
ITGA5	-0.929633	3.83e-12
ITGA6	-0.833255	2.12e-07
ITGA8	-1.84535	6.83e-57
ITGAV	0.604255	4.77e-07
ITGB1	-0.175528	0.167
ITGB4	1.06137	3.11e-07
ITPRIP	-1.46937	3.29e-46
KDM3A	0.233882	9.99e-06
KDR	-0.989648	4.08e-10
KL	-1.57533	5.31e-61
KLF12	-0.296212	1.32e-06
KRAS	0.389619	3.15e-05
LAMA3	-1.52942	2.37e-15
LAMB3	0.529794	0.012
LAMC2	-0.0301728	0.915
LATS1	-0.216616	9.66e-06
LGALS1	-0.329444	0.0426
LGALS3	-0.59168	1.69e-06
LMO3	-0.74621	0.000317
LPAR1	-0.137563	0.405
LRP1	-1.02846	6.3e-16
LTB4R2	0.192362	0.000244
LTF	0.500602	0.136
MAP2K1	-0.13331	0.0512
MAP3K7	0.141012	0.00789
MAPK1	-0.32855	4.59e-07
MAPK11	-0.477763	1.47e-06
MAPK3	-0.499468	4.22e-12
MAPK8	0.032131	0.639
MAVS	-0.231502	0.00224
MCL1	-0.657277	1.64e-13
MDM2	-0.110057	0.385
MET	0.362834	0.187
MGAT5	0.023981	0.864
MIR10A	-0.0168134	0.288
MIR141	0.0209674	0.745
MIR1827	0.0291791	0.39
MIR200A	0.208622	0.0881
MIR200B	0.13366	0.201
MIR200C	0.00936443	0.849
MIR204	-0.0088989	0.000963
MIR26A1	-0.110636	3.13e-05
MIR30B	0.0055664	0.905
MIR30C1	-0.00620031	0.815
MIR525	-2.70034e-05	0.915
MMP11	2.78392	8.14e-30
MMP13	1.90483	3.94e-13
MMP2	0.0145151	0.948
MMP9	1.83683	1.1e-16
MNX1	0.60359	3.25e-16
MSLN	-0.721932	0.138
MTA1	0.511345	1.15e-10
MTDH	0.150404	0.0932
MTOR	0.284001	1.64e-06
MUC1	0.00904951	0.973
MYBBP1A	0.459366	1.8e-09
MYC	-0.290334	0.089
MYH9	-0.46005	0.000204
MYO5A	-0.284771	0.000139
NAT1	0.105526	0.296
NFE2L2	-0.594554	2.27e-19
NOTCH1	-0.919367	7.79e-23
NOTCH3	0.563686	1.12e-05
NOX4	0.388354	1.18e-07
NQO1	2.15248	3.73e-19
NRAS	0.0536085	0.623
NRP1	-0.305899	0.0117
NTF3	-0.159643	0.000764
NTRK1	-0.111364	4.36e-05
NTRK2	-0.809877	1.3e-22
OLFM3	0.00656502	0.843
PAK1	0.969849	1.81e-34
PAK2	-0.229163	0.00104
PAK3	0.21972	0.037
PAK4	-0.178335	0.0524
PARP1	0.793581	5.96e-24
PBK	1.56895	5.03e-25
PDCD4	-0.315964	0.000295
PDGFRB	-0.364639	0.00391
PDK4	-2.6084	1.92e-43
PHLDA2	2.06273	1.93e-31
PIK3CA	-0.263091	4.75e-06
PIK3CB	0.0542544	0.578
PIK3CG	-0.4671	1.18e-07
PIK3R1	-0.999707	6.43e-34
PIK3R3	-0.743867	1.93e-13
PIN1	-0.328326	1.21e-07
PLAT	0.606927	0.0147
PLAU	1.75165	6.95e-15
PLAUR	0.0276021	0.907
PLG	-0.0331914	0.27
PLK1	1.76885	2.33e-38
PPARG	-1.63697	4.03e-30
PPP1R13B	-0.31608	0.00207
PPP2CA	-0.118652	0.0349
PPP2R1A	0.0771718	0.232
PPP2R2D	0.127098	0.0173
PPP2R5A	-0.865368	1e-21
PRDX4	1.20517	1.66e-32
PRKACA	-0.4398	7.29e-12
PRKCA	0.0573806	0.729
PRKCI	-0.026984	0.839
PRKCQ	-1.21368	2.81e-41
PRKD1	-0.807083	4.49e-18
PRPF4B	0.0228441	0.762
PTEN	-0.424025	2.44e-12
PTGS2	-0.952687	0.00022
PTHLH	0.710553	3.25e-06
PTK2	0.28577	5.5e-05
PTK2B	-0.688225	2.61e-14
PTK6	1.03562	1.92e-10
PTPN1	-1.03603	1.64e-36
PTPN11	-0.333838	1.97e-05
PTRH2	0.740693	5.07e-26
PYCARD	-0.554477	1.23e-05
RAC1	0.131078	0.11
RAD9A	0.531174	2.96e-12
RAF1	-0.13699	0.00308
RANBP9	0.296442	9.82e-06
RB1	-0.463051	6.97e-10
RBL2	-0.54756	2.51e-12
RELA	-0.0902107	0.111
RHOA	-0.694524	3.83e-31
RHOB	-0.981326	4.62e-11
RHOC	0.14327	0.187
RHOG	-0.486089	4.6e-12
RIPK1	-0.214009	8.78e-06
ROCK1	-0.422083	3.62e-10
RPS6KB1	0.336644	1.4e-08
S100A4	-1.77523	1.35e-22
SATB1	-0.724244	4.12e-19
SCRIB	0.840998	1.67e-13
SDCBP	-0.960324	3.62e-33
SERPINA1	-1.2893	6.87e-07
SESN1	-1.514	5.13e-65
SESN2	0.114147	0.241
SESN3	-0.149094	0.323
SFN	1.09953	1.54e-10
SH3GLB1	-0.42879	2.72e-15
SHC1	0.652475	2.7e-13
SIK1	-0.491534	0.000378
SIK2	-0.954723	1.12e-34
SIRPA	-1.35955	1.97e-28
SIRT1	-0.183556	0.00773
SIRT3	0.0925815	0.17
SKP2	0.761767	1.26e-12
SLC2A1	2.60515	9.56e-38
SLCO1B3	0.495522	0.000115
SMAD4	-0.405641	2.42e-13
SNAI2	-0.0685166	0.733
SOD2	-0.499282	5.47e-05
SP1	-0.151324	0.016
SPIB	0.348187	0.00425
SPINK1	3.33535	1.94e-15
SRC	0.408035	9.78e-07
STAT3	-0.337382	1.2e-06
STK11	-0.0848299	0.414
TAGLN	-0.841661	1.01e-08
TFDP1	0.437241	2.88e-07
TGFB1	-0.631378	2.7e-08
THBS1	-0.812027	1.05e-05
TIMP1	1.4696	3.8e-31
TLE1	0.237934	0.00763
AES	-0.598405	1.45e-14
TLN1	-0.908197	1.01e-23
TLR3	-0.590143	5.87e-09
TNFRSF10B	0.215765	0.0543
TNFRSF12A	0.350274	0.054
TNFRSF1A	-0.155174	0.0954
TNFSF10	-0.905107	3.63e-08
TP53	0.301886	0.00882
TPM1	0.0862461	0.547
TRAF2	0.784885	2.72e-18
TRIM31	0.979499	5.33e-09
TSC2	0.255785	0.000627
TSG101	-0.0149835	0.847
TUBB4A	0.397299	0.00101
TWIST1	0.661734	2.11e-07
UBE2C	2.96264	1.14e-41
UCHL1	1.70556	1.56e-08
USP9X	0.0646563	0.48
VEGFA	0.0904964	0.64
VPS37A	0.0542475	0.658
VTN	-0.60134	2.27e-06
WISP3	0.154951	0.0346
WNT2	-0.957471	2.12e-14
XIAP	0.189549	0.00167
YAP1	-0.360651	0.000297
YWHAZ	0.684568	1.31e-16
ZBTB7A	-0.470293	5.3e-11
ZEB1	-1.17602	4.19e-46
ZEB2	-1.18566	6.08e-50
ZNF304	-0.295134	2.91e-07
ZNF32	-0.207423	0.019
