# Supplementary material for: Identification of crucial anoikis-related genes as novel biomarkers and potential therapeutic targets for lung adenocarcinoma via bioinformatic analysis and experimental verification
Source: Aging (Albany NY). 2024 Feb 9;16(3):2887–907. doi: 10.18632/aging.205521 (PMC10911345; doi:10.18632/aging.205521)
Supplement: Supplementary Table 2 [file aging-16-205521-s003.xls]

## Sheet: supplementary table 2
Supplementary Table 2. The RNA-sequencing details of the 10 genes in the Figure 2C.
	ANGPTL4	BIRC5	CDKN3	DAPK2	HMGA1	ITGA8	PBK	PLK1	GLUT1	UBE2C
TCGA_78_7160	2.04114	2.77487	2.51983	0.978995	6.92311	2.17465	3.11696	2.78558	4.27562	3.41909
TCGA_49_6743	4.63914	4.68318	3.09739	0.670511	7.30839	1.4617	2.78392	3.52784	6.79783	5.45118
TCGA_78_7143	2.53486	3.84426	2.39021	1.16061	6.46056	1.11479	3.16599	2.77457	4.51555	4.97662
TCGA_55_8087	1.9153	0.647461	0.465495	2.09254	5.37285	1.38226	0.395294	0.824103	2.8035	1.04818
TCGA_55_6986	4.06287	2.2708	1.48929	0.963771	6.11341	1.55531	1.49473	1.88139	4.12819	3.37345
TCGA_35_4123	5.05995	5.06562	4.31434	0.449817	7.64868	1.12434	2.81269	2.49051	7.09071	7.28059
TCGA_55_7576	1.91713	4.03475	2.45497	1.00363	6.85121	1.83655	1.51772	2.435	4.69853	5.02799
TCGA_64_5781	4.4173	3.60514	3.41304	1.12499	6.6929	0.882623	3.49456	2.68808	5.75476	2.3712
TCGA_L9_A50W	3.7534	1.95348	1.16994	1.17477	5.56819	1.42722	0.820453	1.46747	3.22798	3.05457
TCGA_97_A4M5	3.01319	1.68817	1.23626	1.07557	6.55778	2.33539	1.28561	2.39182	4.76321	2.72778
TCGA_35_4122	3.62619	5.26985	4.35643	0.540082	7.39665	1.25585	4.18334	3.07258	5.7354	6.57929
TCGA_55_A48Z	4.04341	3.53543	3.82622	1.58633	5.34691	1.24994	2.30685	2.46748	4.91903	5.47007
TCGA_86_6851	0.968507	2.81269	1.61697	1.40262	6.48329	1.3939	1.05286	2.19869	4.19778	3.89792
TCGA_NJ_A4YF	5.7354	3.52257	2.52895	0.631694	6.95635	0.558708	2.81435	2.48159	4.72536	6.00106
TCGA_NJ_A4YQ	4.43575	3.54251	1.87902	0.687224	5.90243	1.20776	2.26572	2.98896	5.35035	4.78864
TCGA_55_6981	5.62441	3.56277	2.55992	1.04548	7.09071	1.5879	1.66544	2.60435	4.767	4.6438
TCGA_97_7546	3.96122	1.74225	1.80812	1.54575	5.03611	3.10116	1.23603	1.52736	2.68892	3.01233
TCGA_MN_A4N1	5.08252	4.36205	2.35105	1.41189	7.56152	1.11346	2.48263	3.53966	4.96951	5.68571
TCGA_62_A471	5.72288	4.90741	3.24444	0.476625	7.72754	0.406225	4.31603	3.43386	6.31705	5.2569
TCGA_55_7570	1.74507	5.21087	4.85294	0.604415	7.90689	0.860084	3.83377	4.30708	8.16259	5.71666
TCGA_44_3917	3.92995	4.96692	3.92825	1.60353	5.27738	0.650651	3.78046	2.70528	4.96012	6.04937
TCGA_55_A4DF	2.05043	3.8298	4.34209	1.32167	7.01722	0.457262	3.45347	3.42611	6.93997	5.68571
TCGA_78_8648	4.21132	3.09621	1.88166	1.15468	6.01099	2.44074	1.62821	2.21903	3.97774	3.01173
TCGA_67_3770	4.857	4.96863	2.18728	2.60167	5.20981	1.12434	1.34544	1.03491	4.17542	2.31212
TCGA_50_5936	4.7487	3.22987	2.60083	0.548413	7.50708	0.937287	3.14051	3.13538	6.52955	3.68845
TCGA_67_6216	5.1688	2.44102	1.19833	0.808188	5.39567	1.02951	1.5845	1.79713	5.07972	2.8744
TCGA_69_7974	4.32894	3.94179	2.64187	1.14533	8.12952	1.76808	2.0734	2.84997	5.79117	4.9464
TCGA_93_A4JQ	2.96556	3.9887	3.24037	0.891958	6.96061	1.57651	1.71959	2.59186	5.71354	5.14941
TCGA_55_8207	3.41778	0.966341	0.746603	1.01645	4.78187	3.51023	0.598637	0.69428	4.02841	1.8013
TCGA_97_8176	3.15499	4.43696	2.66592	0.454774	8.06465	0.921795	3.73915	4.10166	7.04431	4.67129
TCGA_86_8280	2.09333	2.1059	1.57475	1.72452	6.26242	2.71535	1.1715	1.63502	4.02046	4.13448
TCGA_MP_A4T8	5.80095	3.78087	2.45283	0.343324	7.90689	1.68478	3.43822	2.96191	5.83497	4.8722
TCGA_55_A492	1.93102	1.56076	1.23001	3.15767	5.6721	1.8389	1.50195	1.18492	1.6921	2.21985
TCGA_J2_8192	4.49235	1.48905	1.27785	0.842854	5.04899	1.8579	0.789711	1.10998	5.03982	2.5602
TCGA_50_8460	3.93629	2.2145	1.62207	0.684337	5.54873	2.26866	1.5134	1.89427	3.18342	2.83304
TCGA_55_8097	1.77231	1.02387	0.544729	2.71233	6.44088	2.45711	0.385938	1.06543	1.60174	2.49772
TCGA_55_A490	7.50708	3.8468	3.64886	0.645109	6.98638	1.40939	1.2266	3.88583	5.0271	6.01877
TCGA_86_7711	4.45133	4.64922	2.53058	1.146	7.71986	1.26668	2.86289	3.41068	6.35008	5.3933
TCGA_MP_A4TK	7.02143	3.86432	3.00913	1.28391	5.61411	2.27131	1.73501	3.05077	6.03082	5.17286
TCGA_50_5066	3.41402	5.01295	4.5392	0.836299	6.50644	1.68298	3.9795	3.13115	4.82078	5.32277
TCGA_50_5942	0.733331	0.848349	0.487186	1.68219	5.16369	2.78889	0.613026	1.04861	2.85445	1.29725
TCGA_69_8453	3.28455	2.94412	2.06304	1.20499	6.59501	2.83986	1.53913	2.67144	5.08252	3.79832
TCGA_44_8119	6.01288	4.18922	2.6717	1.39266	7.01288	1.43098	2.34891	2.52735	6.12377	5.34339
TCGA_MP_A4TE	4.20179	3.72577	2.73952	0.958019	6.8782	0.585128	3.32364	3.01144	3.92953	3.27255
TCGA_55_6543	5.5777	1.241	1.21463	1.71096	5.15547	1.34569	0.997888	1.15092	4.4912	2.06546
TCGA_49_AAR3	1.57577	4.16994	3.34636	0.794203	9.44487	1.05503	2.9573	3.64346	4.18527	6.22893
TCGA_38_4632	4.19727	5.40767	3.4714	0.770444	7.29718	0.882068	3.56133	3.29716	5.5407	6.52648
TCGA_62_A46S	4.36372	0.988341	0.743789	1.91501	5.50586	1.58607	1.15806	1.25466	3.64851	2.21663
TCGA_99_8033	3.74603	3.9278	2.57051	0.832862	7.77731	0.740488	2.25122	3.90964	5.71979	5.3082
TCGA_55_6980	5.66452	1.54837	1.18514	2.19627	5.82987	2.98781	0.350775	1.14955	5.62441	3.70689
TCGA_91_8497	1.3583	0.899615	0.796935	1.67564	5.5407	2.64658	0.60222	1.02562	2.82888	1.86215
TCGA_64_1680	4.1451	3.23168	1.5022	0.551709	5.3765	1.5045	2.02457	1.66753	3.04274	2.97704
TCGA_86_7953	2.88455	4.64922	3.42111	1.30541	8.14017	0.796438	2.76853	3.85451	5.22563	5.003
TCGA_55_8616	4.99418	2.83702	1.69815	1.94031	7.46687	2.21127	0.891774	1.98598	4.1393	4.24959
TCGA_86_8055	6.47192	3.09767	2.4555	0.649128	5.62441	2.15529	1.49989	2.43883	6.46357	3.8234
TCGA_73_4668	6.43809	3.27825	2.21636	0.966148	8.45932	2.0601	2.24429	3.09111	6.04937	5.18915
TCGA_95_7567	2.10246	3.5872	2.84882	0.975611	7.02598	1.35781	1.51089	2.48185	4.2858	6.0578
TCGA_99_AA5R	3.41304	1.19369	1.10322	2.40875	5.34926	3.13385	0.51405	1.06914	3.4409	3.7959
TCGA_97_8174	2.13682	1.06016	0.670511	1.85213	5.66301	3.9578	0.86102	1.06988	2.0928	1.42799
TCGA_55_8089	6.10232	4.00487	3.12668	1.04323	7.76896	1.23324	3.69888	3.2407	6.47463	5.12062
TCGA_69_A59K	4.61497	2.3063	2.32335	0.729739	5.06379	1.19111	2.43473	2.70175	7.57566	4.6316
TCGA_55_6978	4.10306	4.01777	3.06753	0.745063	8.50374	1.5533	3.49136	3.28267	5.38256	6.75296
TCGA_78_7153	1.41164	3.30422	2.19869	1.29343	5.70881	0.984098	2.34066	1.94057	2.59051	4.14945
TCGA_69_8254	2.57805	1.56584	1.0345	1.12323	5.14045	1.58945	1.26623	2.97591	4.24753	2.29005
TCGA_J2_A4AE	5.25362	1.70105	1.1124	2.29757	4.39904	1.68738	1.07686	1.1856	2.7666	2.56832
TCGA_78_7150	4.2963	4.09973	3.40006	0.516554	7.54752	1.00919	2.72029	3.54114	8.12952	4.55562
TCGA_93_A4JN	2.22475	2.57187	2.19306	1.47994	7.36059	2.72752	1.74353	2.89875	4.13111	5.75476
TCGA_J2_8194	5.12358	1.17884	0.914439	1.14977	6.35528	1.9458	0.791398	0.869155	3.23047	1.6788
TCGA_55_6712	3.38986	3.86554	3.66329	1.36696	8.25886	1.89686	1.58945	2.63825	5.62146	5.768
TCGA_55_7815	1.47055	2.89164	2.79545	0.902099	4.11346	1.13258	3.11454	1.98386	4.03844	4.06834
TCGA_50_5049	3.14022	3.7166	2.79712	1.16533	5.9561	1.94031	1.78655	2.56291	3.4986	4.66778
TCGA_49_4510	4.85778	1.41316	0.777321	2.20771	5.58462	1.84317	0.436576	0.822711	4.30471	2.27403
TCGA_73_4666	2.06331	4.60044	4.52431	1.29748	9.85374	0.807832	3.62877	4.2611	4.47555	6.99978
TCGA_MP_A5C7	0.910234	1.82312	1.08851	1.42697	6.46638	1.2365	1.87581	1.5256	2.7253	2.73131
TCGA_55_7994	0.914439	4.28734	2.23519	1.10864	8.06465	0.630202	0.411015	3.28328	5.49775	5.26646
TCGA_95_7039	6.06594	4.26942	2.90998	1.31343	8.445	2.15369	2.04723	3.15289	4.6588	5.26756
TCGA_78_7156	0.914636	0.934688	0.779448	3.40138	5.38633	2.44609	1.07344	1.11589	1.51646	1.89712
TCGA_55_8299	4.94299	3.62767	2.36858	1.30158	6.1113	1.82447	2.54125	2.62335	4.83571	3.65927
TCGA_44_7661	6.65536	4.70618	3.10322	0.802153	8.64762	1.9123	3.35162	3.55883	6.53864	5.6508
TCGA_44_4112	6.02066	3.44025	2.72898	1.34323	5.26985	1.14441	2.71755	2.56832	5.19641	4.76321
TCGA_69_7765	5.19019	2.89193	1.71109	1.30517	6.05978	2.77073	2.09201	2.16138	5.19741	4.90497
TCGA_55_7281	5.6584	2.78889	1.77496	1.08244	6.189	1.5468	1.37201	2.06573	4.45603	3.98484
TCGA_50_6597	3.21213	3.10712	2.31265	1.81416	5.4275	1.53708	1.09137	1.0096	3.38265	4.49599
TCGA_73_4677	2.94778	1.8226	1.27073	1.85346	6.08285	2.11866	1.69737	1.33812	2.83275	2.52547
TCGA_MP_A4SW	3.95084	3.14111	2.08613	1.35384	6.04301	1.15157	1.21885	3.25603	3.65216	4.30629
TCGA_55_6972	0.494687	2.50695	2.06143	2.4864	6.63293	0.926946	1.76472	1.52329	1.57651	4.3514
TCGA_78_7633	1.11065	2.21689	1.33196	2.50396	6.34483	2.47097	1.60253	1.47361	2.13497	2.35818
TCGA_44_2659	4.15378	2.2161	1.1988	1.41265	6.00301	2.30103	1.50065	1.75293	3.58899	2.06785
TCGA_55_6983	2.91716	2.5399	1.50757	0.745536	5.04617	1.48852	1.67853	1.52787	3.38621	3.21025
TCGA_97_A4M0	1.17567	1.44755	0.728208	2.84911	4.81612	1.18514	0.733025	1.56937	3.3738	2.72832
TCGA_50_5068	4.21479	4.25066	3.21151	1.37897	4.99071	1.62181	2.43204	1.60379	3.98261	4.62624
TCGA_86_A4P8	2.08342	0.641166	0.533039	2.84239	5.38633	3.31874	0.265731	0.7544	1.43369	1.09867
TCGA_86_A4D0	1.38274	5.07038	3.97863	1.0377	8.15119	0.463379	4.20625	4.29055	3.66114	5.91145
TCGA_55_8085	2.83957	4.00351	4.10023	0.765049	6.99086	1.02951	3.3676	3.32651	4.78413	5.40413
TCGA_50_5935	4.56253	2.09092	1.75528	2.02163	6.05355	1.34618	0.931356	1.61256	4.44773	3.18492
TCGA_53_7813	1.77051	3.56277	3.1724	0.997888	6.10899	0.54267	3.17703	2.01294	3.15649	5.76314
TCGA_73_4662	3.19514	2.23545	1.26146	1.12434	6.35528	1.96193	1.41891	1.69345	3.61193	3.80791
TCGA_62_8399	4.6316	2.84523	1.74876	1.19624	7.68779	1.78968	1.99602	2.31265	5.18385	5.5045
TCGA_44_7671	2.96033	2.06035	1.43818	1.81835	6.93997	2.29492	2.19816	1.91257	5.2374	2.58104
TCGA_97_7552	1.2405	1.45648	1.20637	1.16265	5.93933	3.27763	1.23674	1.51162	5.09394	2.15579
TCGA_44_6145	2.89249	3.03214	2.00535	0.941323	6.16164	1.63344	2.0303	2.53569	4.94895	4.31049
TCGA_44_7670	3.77852	4.98543	3.52257	0.531992	9.55327	1.12455	3.14894	4.35528	6.15935	5.70881
TCGA_49_AARO	5.23097	2.93462	2.28923	0.636007	7.30284	2.47994	1.57756	2.69333	6.12179	6.46922
TCGA_44_2657	2.21636	2.74092	1.76074	1.2875	5.91145	2.31187	1.32433	2.29971	4.26002	3.77218
TCGA_55_8204	2.45988	3.84058	2.54371	0.692516	7.18824	1.34865	2.11202	2.49316	5.66913	4.38819
TCGA_64_1676	5.91334	4.4876	3.51656	1.32705	6.37337	0.786032	3.148	2.45576	4.84745	3.25291
TCGA_91_8496	3.1357	1.66389	1.36672	2.3013	4.68875	2.11175	0.970906	1.3041	3.6685	2.15023
TCGA_55_8096	5.09212	1.8437	1.61333	2.01816	5.26218	1.71984	0.54681	2.2716	5.79274	3.39383
TCGA_67_6215	4.35701	2.39453	1.62026	0.845318	6.31705	0.871542	2.39399	2.50477	3.83142	3.18924
TCGA_53_A4EZ	1.84762	4.49896	4.42065	0.871366	7.68779	0.473162	3.53614	3.16875	4.5268	5.99514
TCGA_MP_A4SY	4.11584	3.27919	1.86586	0.573478	6.49165	1.71169	2.73737	2.28923	5.72288	4.98101
TCGA_73_4676	3.40306	4.99418	3.92909	1.15537	7.14284	1.66805	4.52302	3.24286	5.55149	6.30678
TCGA_86_8075	3.05869	3.23047	2.32879	1.12741	6.9108	1.80784	1.29343	2.46961	5.64202	4.38819
TCGA_78_8660	3.88795	4.23532	4.4289	1.56812	7.69609	1.22917	1.87634	4.07113	4.4876	6.88971
TCGA_91_6840	3.08931	2.97507	3.53896	1.24738	7.47332	1.83447	2.62553	3.03099	3.72504	6.00301
TCGA_44_2665	4.01374	2.27697	1.8284	0.546219	5.67959	2.06969	1.34178	2.19522	5.56953	2.80935
TCGA_75_7025	2.34517	0.751622	0.440262	1.20637	5.32956	3.56741	0.274904	1.06825	2.93433	1.60945
TCGA_44_A479	2.89875	2.79962	2.51045	1.8355	5.93359	1.14062	1.96167	2.43176	2.08026	5.02621
TCGA_78_7146	4.41671	3.43217	4.2103	0.250774	8.54949	0.470875	3.43285	4.12725	6.50367	6.60136
TCGA_91_8499	2.55965	5.44122	4.60562	0.398396	6.68942	0.612776	3.21828	3.66479	6.08091	6.54776
TCGA_55_6970	2.32931	2.6204	2.90295	0.871726	7.60445	1.91339	3.28267	2.41678	5.21928	4.20981
TCGA_86_7701	3.22111	3.39351	3.36563	0.85301	5.53099	1.1633	4.41333	3.54114	3.69847	5.38975
TCGA_NJ_A55R	2.33198	2.655	2.0016	0.737219	6.15935	1.036	2.14487	2.30444	4.00262	3.94866
TCGA_53_7626	4.0779	2.51418	1.55096	1.25231	5.11006	2.5311	1.26956	1.82655	2.63095	3.26588
TCGA_95_7944	4.55318	4.1606	2.53595	1.04735	8.1862	0.917548	3.03777	3.48102	5.0343	4.85544
TCGA_73_A9RS	6.8897	3.79277	3.90772	0.556083	6.94421	0.606094	2.92749	3.34619	4.62358	6.13476
TCGA_44_7667	3.48715	5.74004	4.78641	0.60454	7.61184	0.468482	4.73395	4.67271	4.20828	6.89819
TCGA_55_8301	2.44235	4.15476	3.28587	1.6267	6.40804	2.08561	2.51983	2.93851	4.67886	5.75626
TCGA_91_6835	1.4079	3.13839	1.71615	0.929219	6.28696	2.48531	1.23062	2.18058	3.36563	4.65602
TCGA_55_7725	1.08656	1.28678	1.32855	1.22471	4.44951	1.9559	1.31562	1.18214	2.3333	2.59806
TCGA_50_5931	2.72558	4.73324	2.38114	0.862607	7.83568	1.41163	2.98343	3.35881	6.98194	5.90425
TCGA_55_A494	2.68321	4.03475	2.37953	0.772717	7.28059	0.480197	4.02135	2.80155	4.51376	5.20149
TCGA_50_5930	5.66608	3.28647	2.24988	0.70474	5.76314	1.24146	1.96272	2.27376	8.02352	3.96555
TCGA_38_4627	3.65517	2.65931	2.39616	0.864245	5.64202	3.4817	1.59646	1.92648	4.29469	3.06843
TCGA_55_7903	6.6078	3.98654	2.94806	1.32458	6.80506	0.696177	1.6358	2.84354	5.17181	6.45492
TCGA_55_8619	2.92776	1.19973	1.45414	1.66831	6.20524	2.54125	1.09005	1.87215	4.89994	2.64985
TCGA_55_7724	1.10998	3.04749	3.32264	1.43048	5.3104	2.92425	3.66076	2.47124	6.16392	4.55439
TCGA_50_6590	3.51937	4.26522	4.84281	0.738791	7.70328	0.675351	3.66405	3.72198	6.13913	6.13476
TCGA_69_8255	4.76553	5.39567	2.78613	0.884091	7.62691	0.62847	2.38274	4.03024	2.7167	5.7943
TCGA_73_7498	1.43271	0.856913	0.670864	2.28815	6.53864	2.90769	0.394882	0.926137	1.9559	1.81443
TCGA_78_7148	4.51923	3.35425	2.91573	0.920278	6.84337	1.60454	3.29778	2.91228	5.75806	4.30104
TCGA_95_A4VN	4.23481	4.36487	2.6157	0.723399	6.99978	1.15047	2.29757	3.68427	5.37774	6.67914
TCGA_78_7152	1.97752	2.44211	1.75973	1.04756	6.09795	1.40162	1.42071	2.37224	3.47685	2.62499
TCGA_MP_A4TD	3.70156	3.13477	2.04114	1.16419	6.63925	2.25569	2.12878	2.62389	2.24564	4.00171
TCGA_55_7914	1.99602	2.95701	1.99048	1.76472	6.17298	1.28914	1.51466	1.32604	3.16691	3.38921
TCGA_44_A47A	2.64553	3.55924	1.84205	0.859359	5.7943	1.07321	2.10882	2.58891	3.56562	4.41223
TCGA_97_A4M3	1.71302	1.33171	1.22332	2.19256	6.02264	1.83526	1.0629	1.42271	2.68618	2.55424
TCGA_67_3773	2.93378	2.44451	1.71225	1.17294	5.495	1.50094	1.71484	1.03036	3.33397	1.97163
TCGA_50_6593	3.6914	3.69735	2.4547	0.939187	7.49389	2.57752	1.41616	3.59042	4.01553	4.71333
TCGA_73_4659	5.14941	4.01286	3.18159	0.795564	6.99978	1.71433	2.09517	3.1468	3.86473	4.68098
TCGA_38_4630	1.72788	5.40288	4.09409	0.292334	7.89716	0.162779	4.13976	4.35813	6.51229	6.40543
TCGA_78_7540	3.04749	1.8376	1.32977	1.32829	6.51229	0.942533	1.52123	2.09065	5.95436	3.10351
TCGA_J2_A4AD	3.81742	3.17419	2.95239	0.973981	6.68258	2.22336	2.43746	2.96529	4.79942	4.11202
TCGA_44_6778	1.50886	3.96511	2.3175	1.29652	6.43809	2.39936	4.07881	3.23388	4.12635	5.21503
TCGA_38_A44F	4.48941	1.17546	0.981856	1.44956	6.23138	2.3341	0.617644	1.32754	4.55005	2.68076
TCGA_50_6592	5.81448	3.96122	3.50779	0.833928	8.15119	0.581646	3.39084	3.3974	6.03694	6.86293
TCGA_44_6775	3.34702	3.27508	1.69372	0.796771	5.88242	1.78731	1.61671	2.48886	5.31375	3.92309
TCGA_95_8494	5.55006	4.56068	2.74036	1.90934	6.3348	0.888082	1.98178	3.63498	6.78647	6.98638
TCGA_50_5055	3.36562	2.85892	2.25465	1.0131	6.13044	2.50176	1.4544	1.97112	3.70535	3.95171
TCGA_75_5147	2.44343	4.2564	3.53437	1.46044	6.80131	1.82708	2.01347	2.89193	4.71909	4.68667
TCGA_86_8278	4.77444	2.05664	1.36823	1.7747	5.29474	1.04173	1.49937	2.17682	5.20671	3.73189
TCGA_4B_A93V	6.11759	3.48883	2.00642	2.52602	6.24573	0.385693	2.8993	3.46211	4.67747	5.15547
TCGA_86_7713	3.88922	4.20572	1.86844	1.55507	7.71986	1.13746	1.99791	2.901	5.91145	4.48941
TCGA_55_6982	4.52302	3.50131	2.79135	0.658044	6.91493	2.01032	2.52602	2.88286	6.03082	4.92317
TCGA_67_6217	4.34696	1.53424	0.624341	2.26172	5.51506	2.23947	0.418886	0.948149	2.59508	1.8094
TCGA_49_4512	4.27257	2.83245	2.2219	1.59963	5.4363	2.02215	1.19206	2.16964	3.09142	5.35876
TCGA_64_5774	5.00211	4.59657	3.66076	0.545863	6.39483	0.937287	4.29213	3.90036	4.33932	6.25515
TCGA_97_8177	3.58165	2.49422	1.73345	1.36075	5.70721	1.50809	1.43569	1.85292	4.43696	3.7235
TCGA_78_8640	6.59501	4.20625	2.58184	0.840701	8.3231	0.940555	2.96957	3.55386	6.34227	4.96775
TCGA_95_7947	1.0347	3.4986	2.48074	1.57292	6.68942	1.2358	2.36963	3.56527	4.69154	5.27417
TCGA_44_6777	4.38134	2.27486	1.76679	0.906806	5.29697	3.09621	1.27025	1.88848	5.40413	3.59831
TCGA_55_7816	1.47082	1.50399	1.28797	0.763428	4.36149	0.707477	1.43021	1.3979	1.33346	2.33093
TCGA_49_AAR4	1.39488	3.73189	2.63253	1.85454	6.29948	1.27097	1.43048	2.31265	5.41017	5.48592
TCGA_55_7907	1.98332	3.53966	2.13259	0.634917	6.4978	1.7345	1.73106	2.5391	4.66919	4.61156
TCGA_86_8359	6.79419	2.81128	1.70521	0.949994	5.43873	0.961439	1.45389	2.24988	3.85572	3.66702
TCGA_50_5051	4.65735	3.70194	3.43217	0.774042	5.63604	0.843023	4.08767	3.16072	3.73151	4.79165
TCGA_50_8459	7.00402	1.97776	1.43197	0.655399	5.92988	2.17655	0.997282	1.82047	6.25974	2.86036
TCGA_NJ_A7XG	5.15758	1.21932	0.572139	1.79074	6.44646	0.474146	0.902468	1.53786	4.10684	3.86922
TCGA_49_4488	3.96378	3.8775	3.34933	1.27337	6.0915	1.10655	2.3473	2.3566	6.10899	5.888
TCGA_64_5815	5.28806	3.7	2.60723	0.634378	5.61707	2.15791	1.65251	2.57941	6.45492	4.50081
TCGA_86_8056	1.60328	1.23156	0.524551	1.18744	5.78463	1.85818	0.980838	0.783403	2.67361	1.80653
TCGA_78_8655	3.46999	2.71971	1.73373	1.05437	6.10232	1.85135	1.49604	1.9947	4.46657	3.52888
TCGA_MP_A4TF	5.96757	3.0226	2.36963	0.576991	8.25886	0.429	2.25989	2.36352	7.20892	4.64185
TCGA_55_8203	3.59079	3.05926	2.57913	0.618421	6.12377	0.91177	3.09768	2.66121	3.73113	5.01919
TCGA_91_6848	3.0902	4.89667	2.96134	0.368076	8.50374	1.50988	4.25587	4.12589	6.06374	5.21616
TCGA_86_8073	2.39616	2.86954	2.38089	1.9195	6.57315	2.21825	2.25385	1.51037	4.3808	4.31976
TCGA_64_5775	6.29472	3.9857	4.18284	0.390284	9.90597	1.0293	2.9355	3.58311	4.38133	6.1707
TCGA_44_7659	4.38024	0.93383	1.21978	2.12	4.8263	1.32046	0.538927	0.824431	3.23359	2.208
TCGA_55_A4DG	0.972932	1.27384	0.993928	2.32283	5.49117	1.34494	0.529236	1.15968	2.6412	2.85225
TCGA_55_6985	4.24959	3.48036	2.3622	0.817362	6.37597	1.80337	2.07023	2.73871	5.03703	5.04337
TCGA_86_8054	4.26577	4.12056	3.31489	1.14865	6.01288	1.10476	4.27935	3.4044	4.50266	5.87343
TCGA_38_4629	3.88756	5.26756	3.91807	0.980421	8.89686	1.37047	2.86868	3.83496	7.05782	6.75296
TCGA_78_7147	2.71098	3.6914	2.68754	1.89029	6.41068	0.925543	2.06679	2.38329	4.63436	4.387
TCGA_55_8092	2.61292	2.37875	1.25043	0.742046	6.31943	1.17771	1.67326	2.61735	6.17519	4.48277
TCGA_86_A456	3.7023	1.71329	1.39526	1.97859	5.79274	1.54293	1.00591	1.53196	3.39711	3.64311
TCGA_55_8302	2.62012	3.823	2.98838	0.765194	7.38392	1.02222	1.73655	3.11272	5.74646	7.8272
TCGA_55_8511	4.88915	3.56386	2.97562	0.680562	7.95324	1.27571	1.9273	3.35162	4.98633	3.83222
TCGA_97_7941	2.28071	1.16106	0.827561	1.26716	6.06374	1.89817	0.784414	1.50625	4.62959	2.164
TCGA_62_8397	2.27512	2.39073	1.39118	1.8226	5.28919	1.05801	1.48296	1.12943	4.50806	2.47472
TCGA_91_6830	1.99125	2.29517	2.15555	1.01683	6.39483	3.72466	1.6236	1.9881	7.59035	4.16747
TCGA_44_3398	6.22421	2.94722	2.52761	2.28658	4.7205	2.03485	2.08342	1.38893	5.72603	3.75604
TCGA_44_2656	3.09649	3.22607	2.2227	0.84693	4.80998	2.59591	1.86242	1.17816	4.19975	4.63575
TCGA_55_1592	2.34146	2.97937	2.02561	1.25869	6.77519	2.05637	3.74332	2.59644	4.78791	4.27366
TCGA_91_A4BD	3.00334	1.53043	1.41867	1.81045	4.96354	1.07471	0.659152	1.12741	3.28044	2.86484
TCGA_78_7149	2.29543	1.79738	1.01279	2.98579	5.72288	2.56613	1.10719	1.55869	4.19276	3.47339
TCGA_78_7535	5.9561	3.96208	2.56208	1.36051	5.16168	0.888645	2.61405	3.07258	3.9795	6.15935
TCGA_49_6742	2.77443	4.40464	3.28362	0.630866	7.23034	0.990143	4.05516	3.56457	5.03164	5.09114
TCGA_64_1679	4.23278	3.02551	2.3508	1.50094	6.72787	2.14996	1.57679	3.09231	7.02143	4.82396
TCGA_69_7760	6.87425	3.68808	2.06211	0.735217	6.92311	1.06057	1.81916	3.06461	5.46496	5.04076
TCGA_55_6987	2.91228	3.85287	2.61102	1.42647	6.79419	1.29557	2.57077	2.49719	5.69035	4.36205
TCGA_55_A48X	1.71122	2.39154	1.64473	0.948424	7.08621	2.02928	1.66493	1.90413	3.75222	3.40274
TCGA_86_8673	5.54071	3.89584	2.37656	1.72298	5.768	0.793874	2.42612	2.76633	5.45744	6.04937
TCGA_86_8674	3.85777	2.6744	1.98228	1.04323	7.13796	0.770934	2.39989	2.30264	2.69828	3.7714
TCGA_49_6744	3.1086	2.42904	1.47839	1.16083	6.10899	2.25412	1.11946	1.99819	4.32192	3.43217
TCGA_44_5643	2.18084	4.60691	2.58674	1.04925	8.24654	0.521604	3.621	3.40407	5.71979	5.60299
TCGA_49_AARQ	1.7815	3.27794	3.83377	1.48121	4.78864	0.399476	2.17707	2.10853	4.54876	7.54752
TCGA_55_8094	5.43259	3.92521	2.74976	0.537182	6.40263	0.312094	3.41235	2.84042	6.65215	5.87894
TCGA_MP_A4TC	5.33296	3.64237	2.58564	1.12123	6.73504	1.26014	2.4921	3.37148	6.21223	5.16674
TCGA_49_AAR0	1.94607	3.41672	3.22382	2.59186	6.23607	1.0687	2.66952	3.18774	3.40172	5.54601
TCGA_75_6214	1.62412	4.30786	2.89702	0.438582	9.37788	0.402263	2.19653	3.85859	7.00402	5.66144
TCGA_69_7763	3.51761	1.99099	1.15715	0.948823	6.06805	2.80795	1.56178	1.49498	4.44292	2.40746
TCGA_86_8076	2.94612	1.35409	1.12741	1.14844	6.09795	1.95183	0.682902	1.26085	3.94614	2.31454
TCGA_62_A46V	2.06412	2.6179	2.0577	1.35308	5.49241	1.91152	2.21744	1.43122	3.84284	3.83303
TCGA_55_A48Y	3.14288	3.23419	1.70783	0.378217	6.66896	1.854	3.01464	2.70802	4.63776	4.05156
TCGA_71_6725	2.79079	2.56805	1.89842	2.28045	7.08119	0.779448	1.72762	2.16299	3.53506	4.20429
TCGA_55_6642	3.16567	2.79686	2.27376	0.978583	6.33227	2.54261	2.38781	1.95725	5.29474	3.85859
TCGA_78_7220	3.72847	4.25744	3.61231	0.608986	7.37797	1.40312	4.26787	3.35881	5.47792	5.11006
TCGA_L9_A8F4	4.53047	2.71862	2.17761	0.979804	7.00852	0.89867	1.85684	3.16599	5.31489	6.74923
TCGA_35_5375	3.43756	4.94467	5.24601	0.584497	5.75626	0.900958	4.56379	2.77514	4.8714	5.66144
TCGA_50_5939	4.90332	3.90625	2.684	0.76912	7.81027	1.61901	2.33618	2.92719	7.15801	4.4111
TCGA_55_8510	2.73103	3.16599	2.32578	1.80602	7.34873	2.03247	1.44574	2.60804	4.24652	4.91566
TCGA_38_6178	3.53471	2.06969	1.25749	1.16351	7.28059	1.71933	1.15559	2.09227	5.41889	3.39183
TCGA_MN_A4N4	4.11537	2.13093	1.45029	1.17317	8.17443	1.6267	0.922338	2.19816	5.2428	4.1739
TCGA_44_7662	3.86842	4.44349	2.90462	1.42849	9.08592	1.13767	1.7694	3.0478	6.57315	6.29948
TCGA_MP_A4T4	1.77101	4.14756	3.03099	1.01207	6.86663	1.5468	2.07126	2.8207	5.06844	4.85931
TCGA_95_A4VP	5.21087	3.38655	2.74526	2.14061	5.71036	1.79971	2.86318	3.03129	2.37095	5.26756
TCGA_55_8206	0.569737	1.00258	0.733957	2.51391	4.61429	2.80712	0.491134	1.05437	2.42161	2.30076
TCGA_86_8585	6.26242	3.85532	3.16168	1.00466	6.50644	0.927705	3.1526	3.27415	6.56394	6.27233
TCGA_95_7562	3.13767	3.82179	3.9887	1.21932	6.33227	1.11723	3.04098	3.01767	5.81106	5.28269
TCGA_55_8508	4.44413	2.85309	1.85763	1.13327	6.35528	1.13545	2.43826	2.83674	4.73835	5.24816
TCGA_99_8025	6.43547	3.6449	1.8094	1.50961	5.86286	2.16138	1.98624	2.73461	5.21928	4.83175
TCGA_44_7672	5.68571	3.29557	2.87152	0.647038	6.67583	2.11756	2.10908	2.6412	5.17779	5.37891
TCGA_NJ_A4YG	2.314	2.16964	0.945111	0.945889	7.05782	1.42546	1.27502	1.98438	3.42478	2.85501
TCGA_44_8117	5.003	2.7189	1.8189	1.96905	7.14766	1.52123	1.31779	1.92432	4.54306	5.70721
TCGA_62_A46O	2.89818	4.27666	3.15045	0.36957	7.51997	0.470169	4.27101	3.34153	6.30924	4.36596
TCGA_93_A4JO	3.92267	2.83055	1.0715	1.52044	7.04894	1.4232	1.11789	1.80992	2.97363	4.52115
TCGA_44_2666	0.808188	2.57832	1.33098	1.23418	5.73691	1.82814	2.07099	2.90971	3.05135	2.97818
TCGA_67_3774	5.9355	2.10456	1.09403	1.16509	5.3352	2.32072	1.59362	1.38967	4.17441	2.02561
TCGA_86_8358	2.20934	6.05565	4.4076	0.573351	7.16289	0.87705	5.768	4.96951	5.90425	6.52648
TCGA_62_8394	2.15683	4.61222	3.44257	1.36872	6.35264	0.95703	2.14353	3.13265	5.306	5.5612
TCGA_MP_A4T6	2.91487	1.33196	0.677248	2.08774	6.07663	0.599612	0.517403	1.50625	3.16751	2.87722
TCGA_55_8514	5.26646	1.56988	0.794897	1.32385	6.56087	0.93286	0.506265	1.60762	3.35326	3.19267
TCGA_44_6147	3.19174	1.24478	1.53528	1.42047	4.67886	3.19764	0.267934	0.56217	3.72429	2.43557
TCGA_64_1681	3.9202	2.57265	1.88374	1.81153	5.46619	1.6995	0.946653	1.88087	4.03202	4.50205
TCGA_50_5944	1.01663	2.51687	1.44805	1.70601	5.34926	2.9024	1.79153	1.50625	2.71535	2.97304
TCGA_44_A47B	8.03357	3.0711	1.90961	1.75293	5.68118	0.969923	2.50774	1.85161	3.98525	5.17585
TCGA_L4_A4E6	3.05135	1.32631	1.0293	2.60486	5.25147	2.74092	0.552455	1.15425	2.18084	2.24403
TCGA_49_AARR	3.60443	0.975404	0.668519	1.0316	5.06379	4.2564	0.384885	0.958316	4.06242	1.58322
TCGA_49_4507	6.23138	4.80998	3.7979	0.985116	6.83583	0.558589	3.40609	3.53124	4.93968	6.04301
TCGA_75_7027	3.60694	4.3609	2.80269	0.297217	8.29647	0.973578	4.27986	3.8214	8.1076	6.15039
TCGA_38_4625	4.27935	4.85853	3.01435	0.678829	8.81421	0.996857	3.18616	4.51986	5.45874	5.25582
TCGA_44_8120	2.08907	2.34251	1.00833	1.42122	6.64881	2.14274	0.626188	1.94764	4.76848	2.71098
TCGA_44_6776	1.67721	1.48421	1.10213	2.65554	6.62985	2.12053	1.20846	1.43271	3.2583	2.10246
TCGA_62_8402	2.19128	4.5894	2.42799	1.61384	7.7604	0.489807	2.88769	2.84828	4.47253	4.79553
TCGA_75_5125	5.04165	4.59527	2.90267	0.597957	7.71161	0.904889	3.27066	3.68207	6.09795	7.44658
TCGA_64_1678	3.82823	5.2654	5.15239	0.719127	6.50367	0.322567	4.72254	3.42045	4.71189	6.77519
TCGA_97_7554	3.27126	2.63745	2.04989	1.72814	6.59815	2.79601	1.64575	1.97007	3.79991	4.02576
TCGA_78_7167	0.996652	0.631273	0.41513	2.32447	6.43005	1.65539	0.311248	0.659152	2.62227	1.00219
TCGA_50_6595	5.90956	4.07974	4.35031	0.697362	8.73868	1.62181	2.96219	3.93331	6.69652	6.02869
TCGA_64_1677	3.15706	4.58744	4.03519	0.817362	7.11883	0.332739	3.43217	2.43718	5.59157	5.99908
TCGA_97_A4M6	4.47612	2.43204	1.24866	1.93577	6.38117	1.60148	1.56304	1.75766	4.3176	3.09649
TCGA_97_8547	6.25034	2.75393	1.66857	0.657321	5.42507	0.870989	1.24265	2.12106	3.91765	4.09455
TCGA_62_A470	3.08064	3.41203	2.46069	1.39464	6.94421	1.42722	3.22702	2.4037	3.76558	4.49663
TCGA_62_8395	1.95535	1.30278	0.905654	2.19333	5.10334	2.01742	0.608857	1.15157	3.01116	1.87878
TCGA_55_7727	2.27616	3.86273	3.0307	1.07924	4.91816	0.932113	3.04394	2.28018	4.9239	6.44366
TCGA_73_4675	6.03287	2.23146	1.44779	1.52683	5.92435	1.48905	2.0534	2.18461	5.58046	2.24051
TCGA_44_2668	6.23365	4.57268	3.44708	0.574105	9.31373	1.06181	3.00362	4.18334	6.3476	5.50314
TCGA_38_4628	1.19568	4.21378	2.81072	1.1622	6.0915	1.94265	2.20719	2.67225	3.57164	3.84387
TCGA_O1_A52J	3.9999	1.9235	1.32903	2.08054	5.42257	1.29557	0.748686	1.88638	4.05887	3.24788
TCGA_44_7660	2.1379	4.98369	4.03339	1.1076	7.85264	0.191561	3.08689	2.9995	7.01288	5.46376
TCGA_86_8279	5.36228	2.91112	1.56937	1.4036	7.71161	1.38718	1.51365	2.41411	4.59002	5.20981
TCGA_97_7937	3.93629	3.14924	3.08572	2.17734	5.48063	1.30907	1.77651	2.3239	4.12056	5.46376
TCGA_78_7542	4.60691	5.41017	3.58093	0.466489	10.1336	0.698573	3.22111	4.37092	8.17443	6.40804
TCGA_67_3771	3.28488	4.09227	3.61771	0.656638	7.03054	0.846238	2.89619	2.27486	5.79927	5.13258
TCGA_38_7271	2.99421	2.6328	1.73134	0.931742	6.00699	2.55884	0.843191	1.75032	3.31773	3.20439
TCGA_78_7163	6.87053	1.18182	0.930376	1.20616	6.11759	0.175852	0.815761	1.24784	5.61551	2.29679
TCGA_73_4658	5.73069	2.45066	2.15476	1.02698	6.64881	1.83473	1.74613	2.39588	4.72465	4.89994
TCGA_97_8171	1.18755	2.51337	1.73186	1.1221	6.10232	0.734588	2.54723	1.70079	3.86554	3.87879
TCGA_44_6148	0.71349	0.452531	0.365071	0.908154	5.90062	3.90792	0.27006	0.591858	3.13839	0.629123
TCGA_MP_A4T7	5.14839	3.31065	1.89163	1.28632	7.38392	1.19926	2.6744	2.99217	5.91706	5.1688
TCGA_49_4514	2.12161	4.41223	3.43386	0.724001	7.50026	0.945697	3.04216	3.85616	3.92479	6.46357
TCGA_50_5946	3.14408	5.42009	2.93462	1.08393	7.15801	0.62847	3.03389	3.9963	6.05355	6.65536
TCGA_55_8621	4.17943	2.47255	1.30566	1.5845	5.84877	2.81324	0.967328	1.75346	4.45949	5.08446
TCGA_55_8614	3.54321	3.5521	2.80323	1.76392	6.96913	1.4164	2.19946	2.57565	5.64354	5.95054
TCGA_71_8520	6.98638	3.32264	2.40068	1.1091	5.82466	2.22531	1.87607	2.88033	5.25362	4.24037
TCGA_69_7978	2.75252	2.87041	2.632	0.672659	6.70354	1.58973	1.68403	2.57621	6.06594	5.51506
TCGA_L9_A443	3.0572	2.97363	1.96325	0.805421	5.41017	1.89842	1.80311	1.13307	2.74335	2.91458
TCGA_55_7573	2.38861	1.07492	0.986743	2.24856	5.47926	2.35105	0.28157	1.10145	3.13538	1.97353
TCGA_78_7154	2.75282	4.46303	3.66076	0.736137	8.0439	1.66544	3.61305	3.63172	5.82805	4.59189
TCGA_S2_AA1A	1.18951	0.94114	0.685936	1.23511	5.75806	2.41143	0.443927	1.36449	3.22798	2.14141
TCGA_50_6591	4.05611	5.45118	3.90833	0.573351	8.22153	2.65094	3.54888	4.06287	6.35008	7.26932
TCGA_49_4505	5.4275	2.36697	1.74535	1.94341	5.97156	1.94475	0.92439	1.82099	5.19219	3.71433
TCGA_97_8552	3.03042	0.907366	0.538223	1.89791	5.36697	2.16056	0.44837	0.755695	2.78725	1.4404
TCGA_MP_A4TJ	2.99629	2.74947	1.68637	1.16847	5.85909	1.07621	1.38395	1.94107	3.39711	4.16106
TCGA_73_4670	7.11883	4.25533	3.13869	0.308114	7.68779	0.83586	3.4545	3.89829	6.7638	5.46872
TCGA_49_6745	3.21025	3.74066	2.48531	0.968117	7.79298	1.98438	2.18862	2.91856	5.10527	4.89499
TCGA_38_4631	4.49599	5.5612	3.88415	0.2126	7.26373	0.564933	3.73151	4.05469	5.82805	6.58876
TCGA_38_4626	4.21132	2.28419	1.59752	1.57475	5.42385	2.39154	1.49057	1.5949	2.9263	3.15107
TCGA_55_7227	3.47931	2.4731	1.96286	1.66518	5.35511	1.96878	1.81677	1.98043	5.45118	3.54356
TCGA_55_A57B	1.70393	2.19921	1.06357	1.98151	4.68598	2.54723	0.751401	1.60303	3.60443	2.31109
TCGA_69_7979	2.08934	3.54678	2.79991	1.76731	6.10447	1.00074	1.89346	2.50313	4.21479	5.20149
TCGA_44_A4SS	4.25218	2.66592	2.20813	1.21166	7.57566	1.43989	2.5975	2.47525	5.81275	4.39213
TCGA_MN_A4N5	3.32427	3.37934	2.53244	1.24994	6.24573	1.07321	1.11325	2.41783	4.58552	6.25278
TCGA_99_8028	5.26985	2.60435	1.70186	1.15	5.83837	2.15289	1.32804	1.52683	4.49599	5.7214
TCGA_75_5146	1.73476	2.7988	1.55531	2.42295	5.21828	2.28391	2.12533	1.11567	2.30552	2.90741
TCGA_55_1596	4.4173	4.57268	3.45044	0.578566	7.40893	0.855863	3.27446	3.58899	4.06195	5.45874
TCGA_55_7910	4.06287	3.80871	1.81363	1.59963	6.00699	0.732075	2.99658	2.82098	4.38474	5.96757
TCGA_80_5611	3.61594	4.77141	4.15574	1.01023	6.5918	0.215498	3.12425	3.5003	6.10232	4.95841
TCGA_91_6828	2.45118	3.09971	2.12664	1.32314	6.11558	1.95854	2.59722	2.25701	3.0307	3.7801
TCGA_69_7761	3.58386	3.17671	2.13576	0.906049	6.82045	1.83153	2.83729	2.88257	5.74646	4.57776
TCGA_91_6849	2.71205	0.984099	0.641903	2.22011	4.86091	1.47336	0.813636	0.749819	3.4409	1.65795
TCGA_MP_A4TH	1.93443	0.994427	0.706114	2.03643	5.54336	2.58264	0.650651	1.09314	3.20594	1.56837
TCGA_44_7669	2.91746	4.90904	1.91044	1.53887	7.85264	1.27809	4.38248	4.26942	4.66085	5.56819
TCGA_73_7499	0.863157	4.62227	4.07657	0.902099	6.19817	1.08182	3.14832	2.99044	3.12305	5.96375
TCGA_55_8505	6.33227	3.70834	2.28711	0.477759	6.67255	1.10213	3.18524	2.82861	7.66389	4.67271
TCGA_86_8671	2.15683	2.49131	1.75714	1.28103	5.91334	2.01059	0.909276	2.0048	3.59795	3.51478
TCGA_95_7948	1.40286	3.07885	1.42825	2.06359	6.65877	0.688727	1.5592	1.8189	4.33877	3.10322
TCGA_95_7043	2.0169	4.75958	3.62473	2.51204	6.13044	2.43799	1.81809	3.28203	3.89089	5.32736
TCGA_50_5044	6.36576	3.90964	3.18957	0.905654	8.1076	1.82946	3.30454	3.57529	6.67914	5.87168
TCGA_J2_A4AG	5.42627	1.66365	0.973578	1.13767	5.79927	1.89268	0.875023	1.30012	3.39678	3.36435
TCGA_86_7955	7.84432	4.17741	2.97275	1.22284	6.73152	0.358164	4.35084	3.87499	6.83964	4.21083
TCGA_62_A472	1.97537	3.11515	2.69569	0.787368	5.67052	0.644565	2.62499	2.38967	5.04617	6.48886
TCGA_44_6146	1.82998	1.9614	0.899037	0.929219	6.36576	2.09759	1.61569	2.09119	5.37529	2.14141
TCGA_MP_A4SV	3.01291	3.88291	3.51899	0.997497	7.89716	1.07663	1.96878	3.27287	4.64988	6.38117
TCGA_49_AARN	2.56666	2.64011	1.95957	0.685229	6.56686	1.30351	1.22122	1.95535	4.43282	4.71259
TCGA_50_5072	5.11683	4.96951	4.00933	0.613539	7.51351	1.92003	4.55318	4.33877	6.15935	5.2374
TCGA_55_5899	3.08156	4.82078	4.37419	0.508641	6.91493	1.01834	4.3808	3.57307	4.86332	1.62618
TCGA_97_A4LX	1.06396	2.39532	1.87839	0.886188	5.79588	1.77548	2.04908	2.54017	4.04877	3.60946
TCGA_L9_A444	5.55006	2.43664	2.14075	1.28343	6.14131	1.82422	1.49629	2.04961	3.49555	4.93215
TCGA_55_8615	5.20149	3.3362	2.10935	1.16802	7.22527	0.548065	2.08026	2.33488	3.3174	4.59064
TCGA_50_7109	3.72119	3.54251	2.67117	1.55794	6.76009	1.58271	3.41909	2.49422	2.95034	5.28591
TCGA_91_7771	2.98141	1.47055	1.67339	1.80731	5.54601	2.94696	1.87555	1.34742	3.59258	4.02532
TCGA_97_A4M1	2.0414	0.98643	0.849383	2.95443	4.24855	2.19101	0.519444	1.33787	1.87555	1.94421
TCGA_44_5644	4.72254	3.58057	2.37763	1.92838	6.02659	0.47077	2.24509	3.11484	6.79419	5.25362
TCGA_78_7536	4.0071	4.69572	3.99763	0.937844	6.78647	0.721731	3.15198	3.42111	3.21089	6.19131
TCGA_MP_A4TI	5.61551	4.246	3.13385	0.921795	7.48008	1.72507	2.92228	3.52923	5.17286	6.21943
TCGA_99_7458	5.74813	1.94633	1.85346	1.21978	5.32956	2.33223	1.18203	1.5999	3.86842	2.80935
TCGA_64_5778	3.06131	3.4097	2.48559	1.32385	5.43136	1.31195	2.09813	1.95535	3.59757	5.19324
TCGA_78_7145	8.03357	4.20625	3.28488	0.946079	6.37337	1.75871	2.15448	2.65986	7.00852	6.03287
TCGA_NJ_A4YP	3.77612	2.81571	2.12638	0.58549	7.50708	1.22191	2.18836	3.20164	5.04899	4.52238
TCGA_55_7283	2.33618	3.05869	1.84502	1.10322	7.46687	2.17044	1.80576	2.45683	2.95643	4.16354
TCGA_55_8208	3.52222	3.56133	2.34759	0.867922	6.36297	1.41038	1.71562	2.35317	4.91071	5.73069
TCGA_78_7537	2.40956	1.34816	1.00219	3.25733	4.75886	1.43989	1.00258	1.22049	1.98942	1.96039
TCGA_78_7166	6.66215	3.95648	3.14832	0.431362	6.3019	1.07254	3.53402	2.82578	6.58572	5.38136
TCGA_55_7995	2.79962	3.6001	3.80952	1.71802	7.47332	0.5798	1.61436	3.73376	5.45874	5.20047
TCGA_49_4494	5.75626	4.54744	3.74066	0.92067	6.67583	0.759182	3.31165	3.07885	4.95064	5.3104
TCGA_49_4501	1.74276	2.46589	1.63502	1.07344	5.83147	1.78627	0.779606	1.34154	3.59831	3.14529
TCGA_91_6847	2.77704	4.9364	3.3285	1.2748	7.01288	0.614858	2.11465	2.88058	5.94119	6.25034
TCGA_86_A4JF	6.13265	3.47517	2.645	1.41591	6.62034	1.0032	2.72199	3.21025	3.86273	5.90425
TCGA_49_AAR2	3.08096	4.5538	2.65335	1.31633	6.00504	0.58822	3.26338	2.86258	2.30264	5.31708
TCGA_78_7159	4.12774	4.28418	2.96307	0.863706	6.61086	1.19111	2.83674	3.12668	3.9308	5.10711
TCGA_55_6971	3.51268	3.35523	2.50313	1.13678	5.49117	1.58945	2.61021	2.12719	4.59392	3.65781
TCGA_50_5933	5.08343	3.79435	2.52251	0.665362	7.70328	1.5778	2.15129	3.32037	6.99978	5.58323
TCGA_95_A4VK	6.25278	3.40936	1.57317	1.12542	6.19131	1.38371	1.67669	2.35504	3.68243	2.84211
TCGA_64_5779	3.96208	3.68882	2.78392	0.630202	6.14365	1.75636	3.85696	2.36507	3.89751	4.93298
TCGA_44_A47G	7.44658	2.79053	1.84345	1.1061	5.70413	2.22336	1.76286	2.03958	4.26416	3.74527
TCGA_97_8179	1.09469	2.54482	2.16001	1.56151	7.32506	1.88139	2.28419	2.86513	2.18515	4.30419
TCGA_78_7155	2.40095	4.47852	3.75454	0.356766	10.3578	0.666368	2.96047	4.42948	5.86826	6.67583
TCGA_75_6206	1.52302	0.848349	0.591354	2.55394	5.78463	1.82151	0.718728	0.719436	3.05954	1.42997
TCGA_44_2661	1.44574	2.57347	2.06546	1.38422	5.36814	1.56231	1.32953	1.34082	3.34865	2.93507
TCGA_80_5608	6.10673	3.7042	3.05954	1.22073	6.68258	1.19857	3.16502	3.09264	3.49522	5.19019
TCGA_55_6984	4.1221	3.06461	2.37546	0.493956	8.39009	1.02184	2.68945	2.99773	6.38672	4.46717
TCGA_99_8032	4.33541	3.45485	2.18447	1.05587	6.08091	1.35633	2.13368	2.25284	3.4044	4.67061
TCGA_55_8512	0.744565	0.52981	0.417931	2.17601	5.94308	1.40864	0.571301	1.00919	4.90904	1.11901
TCGA_97_A4M2	1.25418	1.03429	0.552169	1.8611	5.93933	2.52116	0.667395	1.25608	2.28525	2.05504
TCGA_67_3772	4.54106	3.14022	2.15895	1.13258	6.1707	2.20188	1.27809	1.69843	4.40936	3.0994
TCGA_86_7954	0.782898	2.58049	1.67195	1.18814	7.06266	1.10563	1.16691	2.76108	3.36206	4.71829
TCGA_L9_A743	6.83583	3.43553	2.10723	1.02845	5.70413	1.91923	2.11229	2.46856	4.11862	5.36579
TCGA_91_A4BC	3.57095	3.71739	3.5054	1.37543	6.80506	1.14396	2.60969	3.24723	3.08514	5.89157
TCGA_91_6829	1.65278	3.23018	2.4304	0.52172	7.44658	2.25544	2.14248	2.51204	3.70384	4.57459
TCGA_44_6779	4.65193	4.51861	3.39775	1.11545	8.30938	0.990982	3.45554	3.68845	6.32977	4.45359
TCGA_L4_A4E5	4.31213	4.54493	3.30041	1.0896	7.4869	0.877225	2.53031	2.87209	4.81846	5.89886
TCGA_53_7624	2.56832	4.90575	3.64671	0.250975	8.17443	0.136878	2.551	3.94787	7.7604	5.74813
TCGA_55_6968	2.00822	4.81385	3.41568	1.04445	7.41511	0.813636	4.76474	4.25847	4.77444	6.45213
TCGA_93_A4JP	1.36775	3.08242	1.74745	2.23947	6.96913	4.12108	2.33898	2.33618	3.33655	4.15818
TCGA_44_2655	2.12849	1.93925	1.36198	0.947845	5.56259	1.58892	1.71122	1.34131	3.3184	2.1968
TCGA_55_1594	2.25778	4.02356	2.07394	1.6665	7.50026	0.685936	2.77429	3.0756	4.27514	5.85568
TCGA_50_5941	1.62949	3.73036	2.61431	0.954692	8.03356	1.82312	1.44703	2.90626	4.59984	4.85294
TCGA_49_6767	2.36963	4.25014	3.63751	0.630202	9.63144	0.528091	3.25004	3.18128	6.50065	8.19683
TCGA_78_7539	1.19695	2.07368	1.28223	1.96775	6.66548	1.30376	0.71596	1.20616	3.04245	1.9881
TCGA_55_7726	2.44287	4.36704	3.41369	0.647894	6.81639	1.74823	2.09597	3.64886	5.81106	6.02659
TCGA_78_7162	1.72865	1.72585	1.26508	2.29165	6.1548	3.05546	1.51187	1.24548	2.74722	2.36669
TCGA_55_6979	2.45362	4.48394	2.44074	1.41464	6.70354	1.66779	2.33592	2.68483	3.81197	5.41392
TCGA_86_8669	3.02464	2.49131	1.39539	1.07557	6.50644	1.55429	1.61723	1.88979	3.80586	3.58238
TCGA_75_6212	5.26114	2.02432	1.79419	1.2637	5.17779	1.68558	1.25231	1.6512	3.8294	2.76716
TCGA_44_3396	5.04617	3.85859	2.01977	0.869882	6.08709	1.69265	2.72616	2.61375	4.53738	4.94382
TCGA_50_8457	2.87381	0.868445	0.788284	1.12388	5.51378	3.20563	0.366702	0.89714	2.44261	1.41038
TCGA_49_AARE	4.47253	3.81197	2.58699	0.494904	6.32191	1.83706	2.96585	3.9857	4.90741	5.73846
TCGA_49_4487	2.83304	4.32356	2.75237	1.63398	6.47749	1.09071	3.41004	3.38521	4.69085	6.98638
TCGA_44_6774	2.96277	3.22111	2.09624	0.964954	7.00402	1.63265	1.64575	2.11597	4.58359	4.23985
TCGA_L9_A5IP	8.27171	3.12245	2.84968	0.51546	6.61414	0.784583	2.98692	3.43353	7.08621	4.07834
TCGA_69_8253	4.79396	1.80731	1.48268	1.15922	6.08091	1.57015	1.62412	1.81809	4.23173	2.76189
TCGA_L9_A7SV	1.28391	4.05424	2.22531	2.43152	6.38672	0.654444	2.26465	2.76579	2.69584	5.15444
TCGA_97_8172	1.69317	1.08547	0.70021	1.42875	5.28806	3.36271	1.10975	1.03377	2.63957	1.44522
TCGA_86_A4P7	3.9474	2.60193	1.37847	1.53451	6.65536	2.37279	0.807141	2.02616	2.57537	3.21183
TCGA_55_7574	6.47192	2.44851	2.07497	1.29675	5.51886	2.01188	1.84097	1.86031	4.47794	5.01473
TCGA_55_8620	1.5299	3.96642	3.34087	0.569737	7.20892	0.870437	4.06743	4.22124	4.78264	6.25974
TCGA_55_7728	2.54561	2.12453	1.74456	1.67142	6.20288	0.618805	1.01477	2.23709	4.65463	3.9578
TCGA_69_7973	3.88626	4.04203	3.6951	0.892298	7.33123	1.12763	4.25272	3.65665	3.02174	5.40413
TCGA_50_5932	2.25858	2.39182	1.84447	1.43148	7.57566	2.13872	1.85949	2.29998	3.96035	3.61482
TCGA_49_4486	1.901	2.06546	1.75134	3.54607	4.88836	1.1958	1.60148	1.24123	2.27992	2.60619
TCGA_78_8662	4.04522	4.33157	2.55802	2.34785	8.23401	1.32878	1.71043	3.33397	6.50367	5.75978
TCGA_95_8039	5.1698	3.13025	1.64287	1.96459	5.96757	1.66572	1.30786	2.00507	4.23532	3.31489
TCGA_MP_A4TA	4.20777	4.26314	2.76108	0.329447	8.17443	0.723686	3.04304	4.86979	5.50053	5.02096
TCGA_69_7764	1.50679	3.01263	1.34569	3.8615	6.59815	1.85555	1.98043	1.46473	2.3223	3.58348
TCGA_44_A4SU	4.27101	1.92058	1.70509	1.72452	6.10017	1.64883	0.697518	1.98691	5.12664	3.49623
TCGA_49_4506	5.37175	4.45773	4.00443	0.523277	7.07179	0.542898	4.03024	3.49321	4.28525	4.42418
TCGA_78_7161	6.23607	1.72452	1.32096	1.95295	5.18281	1.50705	1.36823	1.24784	3.08454	3.39284
TCGA_49_AAQV	5.07135	3.11424	2.61957	1.13903	6.46922	0.784753	1.87396	2.42692	4.27101	5.09394
TCGA_62_A46P	2.72724	2.16646	1.19809	2.3749	5.12664	0.950765	2.42639	1.50651	2.21316	4.58806
TCGA_49_6761	7.40893	4.05931	2.86868	0.641022	6.50367	0.708091	1.6644	3.03893	5.13161	6.93608
TCGA_44_3919	4.21781	3.30968	2.12013	1.0927	5.24816	1.86375	1.20753	2.32072	5.39986	3.70613
TCGA_69_7980	3.29557	2.59294	1.64628	1.51466	7.59035	1.77651	1.22566	1.89634	4.03799	4.33932
TCGA_93_7348	3.89912	1.93925	1.25918	1.04589	5.75311	1.70158	1.42775	1.62645	3.52043	2.75943
TCGA_78_7158	0.809215	2.23627	1.48954	0.686152	7.09071	0.88769	1.47003	1.79577	1.96905	3.24348
TCGA_91_6831	2.90489	4.44715	3.37966	1.30207	6.88576	0.903597	3.91173	3.56597	3.94487	5.58186
TCGA_97_8175	4.5311	3.23388	2.17305	1.00571	6.02659	0.748182	2.31029	2.06304	6.87053	4.72679
TCGA_44_5645	2.08054	1.03119	0.775857	1.73603	3.75185	2.85472	0.327509	0.519161	3.31807	1.92865
TCGA_50_6594	5.81448	4.18527	2.56374	0.496977	8.50374	0.902272	2.54099	3.46827	6.22421	5.53794
TCGA_86_7714	0.951551	1.56076	1.08743	0.965566	5.4846	1.65487	0.984098	1.61384	4.33432	2.43362
TCGA_86_6562	6.65877	3.22446	2.36456	1.14286	5.79757	1.73022	2.28949	2.3566	5.76645	4.93215
TCGA_55_8090	5.40767	2.73708	1.96091	1.20479	5.63175	1.32928	2.26465	2.27486	5.78463	4.03658
TCGA_55_7911	3.27478	4.5168	2.7864	1.10931	6.06594	0.927531	2.70337	2.83788	4.27882	4.6451
TCGA_55_8507	6.74923	4.29213	2.72587	1.57679	7.68779	0.892298	2.44184	2.98781	3.1381	5.48592
TCGA_93_8067	3.83377	3.71357	3.42277	0.573854	6.99516	1.15537	3.20715	3.71393	6.14811	5.21192
TCGA_44_3918	1.36648	3.43619	3.30936	0.631833	4.11252	2.0077	2.02058	0.650375	4.38024	3.93038
TCGA_97_7553	1.8548	2.62416	1.22096	1.2844	6.41606	2.84182	2.39532	1.91976	4.06879	4.24959
TCGA_55_8205	1.03242	4.85379	3.6753	0.810589	9.08592	2.14969	3.17387	3.63751	4.70553	6.07871
TCGA_86_8668	5.86464	1.63265	1.01146	2.12238	4.92063	2.53486	0.529123	1.73398	3.9092	1.96218
TCGA_62_8398	4.42014	3.7166	2.36697	0.652885	8.71985	0.865163	3.80307	3.87585	7.65636	4.73395
TCGA_55_8513	3.06187	0.947052	0.596566	1.46093	5.38021	2.07523	0.589703	1.24003	4.84667	1.84787
TCGA_83_5908	1.94893	4.77662	3.57953	1.24738	9.59178	0.954888	4.11252	3.83303	6.13476	7.29718
TCGA_44_2662	6.44366	4.1059	2.76026	1.27265	8.79442	0.773216	1.99819	3.99763	6.95635	5.36814
TCGA_50_5045	4.18138	3.66441	2.95208	0.799621	6.27491	2.50341	1.99711	2.36087	4.23278	4.4882
TCGA_91_6836	3.45902	5.09394	3.30936	0.474892	7.07179	0.431456	3.99048	4.13976	6.76009	2.72911
TCGA_55_6975	5.55431	4.81846	3.61015	0.635192	7.10489	2.08453	4.00171	3.95603	5.79757	5.36112
TCGA_55_A491	3.48849	2.69501	1.82204	1.1856	7.36059	1.03344	1.0788	1.38127	3.93162	4.19177
TCGA_93_7347	2.17331	2.42451	1.44219	1.08331	5.73382	1.9153	1.11688	1.91339	3.59904	2.92749
TCGA_MP_A4T9	5.29474	2.91169	1.91609	1.81757	7.21962	2.32447	1.06313	2.10246	4.98369	4.57335
TCGA_49_AAR9	6.67914	5.12968	3.19238	0.576637	9.67404	0.270886	3.16722	3.77417	8.34856	6.48886
TCGA_55_8091	6.30924	2.21985	2.09678	1.09117	4.61429	1.35657	1.88584	1.41163	5.1688	3.34214
TCGA_97_7547	1.07061	1.24289	0.654079	0.814145	5.83316	4.00351	0.821299	1.17093	3.98084	1.44755
TCGA_62_A46R	4.10072	3.48679	2.34626	1.49006	5.40652	1.22049	2.00187	2.18515	3.00243	4.4648
TCGA_49_4490	3.56493	2.50098	1.51872	1.70708	7.19824	1.45157	0.771092	1.98178	4.96863	3.57882
TCGA_62_A46Y	3.54712	2.43883	1.70263	0.985917	5.96757	1.60353	1.97964	1.95212	4.34481	4.29162
TCGA_97_A4M7	4.35757	1.90883	1.17727	1.09514	5.9355	2.39907	0.569367	1.98968	3.25353	3.02985
